# Supplementary figures and images for: Coordination behaviour and biopotency of metal NN salen complexes
Source: Royal Society of Chemistry journal article supplement (doi:10.1039/c2ra20733h), 2012-01-01

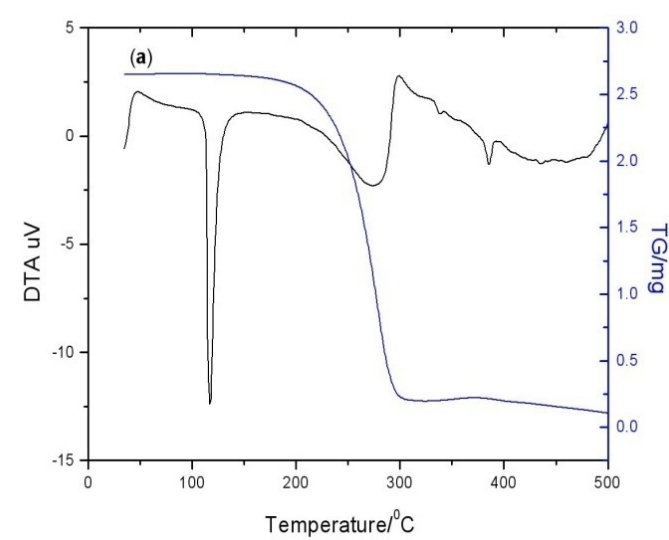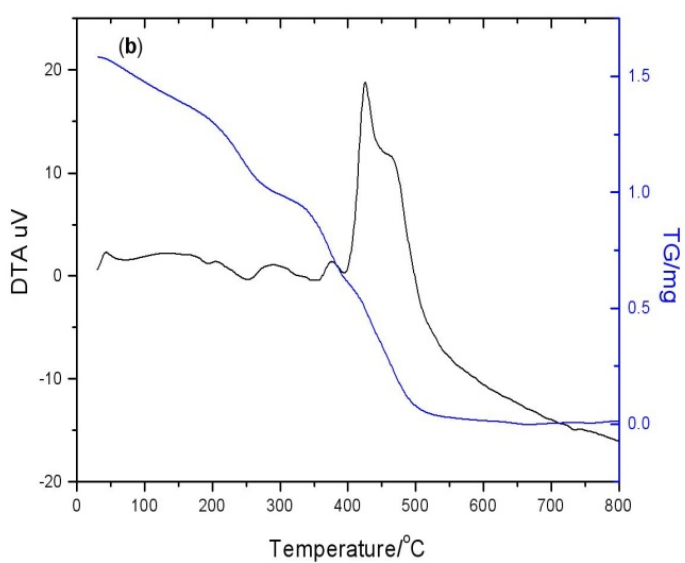

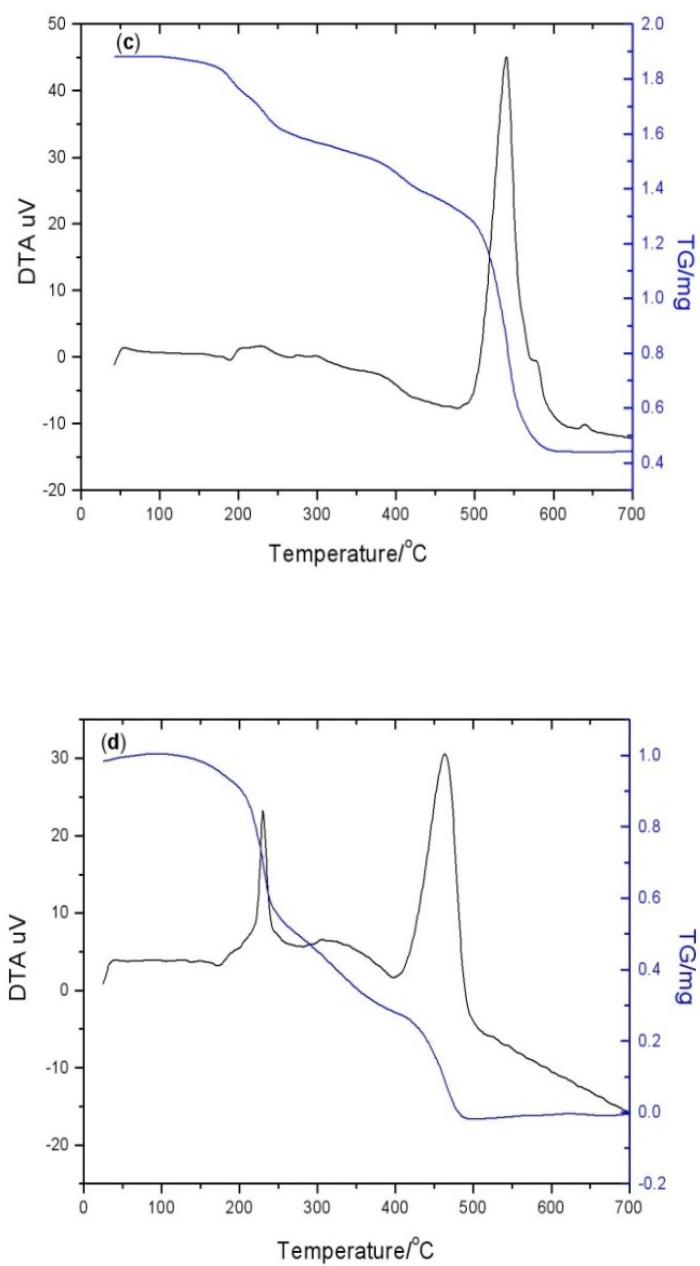

Fig. S1 Thermogravimetric analysis (TG/DTA) of salen ligand, (1), (2) and (3) complexes.

Supplement: c2ra20733h.pdf [file c2ra20733h.pdf]
